# Supplementary material for: Probing the early stages of prion protein (PrP) aggregation with atomistic molecular dynamics simulations
Source: Royal Society of Chemistry journal article supplement (doi:10.1039/c8cc04089c), 2018-01-01
Supplement: c8cc04089c3.pdf [file c8cc04089c3.pdf]

1 Supporting Information for:

2 Probing early stage of Prion Protein (PrP) aggregation with  
3 atomistic molecular dynamics simulations

4 Collu Francesca<sup>a</sup>, Spiga Enrico<sup>b</sup>, Chakroun Nesrine<sup>a</sup>, Rezaei Human<sup>c</sup> and Fraternali Franca<sup>a\*</sup>

5 May 22, 2018

6 **Author Information**

7 **Affiliation**

8 <sup>a</sup> King's College London, Randall Centre for Cell Molecular Biophysics, London, UK

9 <sup>b</sup> Computational Cell and Molecular Biology Laboratory, The Francis Crick Institute, London,  
10 UK

11 <sup>c</sup> Institut National de la Recherche Agronomique (INRA), Unité de Virologie et Immunologie  
12 Moléculaire, Jouy-en-Joussas, Cedex, France

13 **Corresponding Author**

14 \* E-mail: franca.fraternali@kcl.ac.uk (F. F.)

## 15 **Methods**

16 The box for the molecular dynamics simulations is prepared as follow: 18 miniPrPs ( $\beta$ -rich  
17 H2H3-Ov PrP<sup>Sc</sup>) are placed on a grid (3 x 3 x 2) with random orientations (Figure SI-1).  
18 The distance among each miniPrPs in every direction is initially fixed at 3 nm. The box is then  
19 solvated with SPC waters<sup>1</sup> to obtain an orthorhombic Bravais lattice having edge lengths of 14.5  
20 nm, 14 nm and 10 nm respectively. This leads to a box cell containing approximately 200000  
21 atoms (Figure SI-1). 18 Na+ have been added to neutralize the total charge. The Gromos53a6  
22 force field<sup>2</sup> and the Gromacs package<sup>3</sup> have been chosen for running the molecular dynamics  
23 simulations. Cys182 and Cys217 have been connected with a disulphide bond because this is  
24 the case in the ovine prion proteins<sup>4</sup>. The PME method has been used for the calculation of the  
25 electrostatic contributions to the non-bonded interactions<sup>5</sup>. The equilibration phase consisted  
26 in raising the temperature from 50 K to 300 K with steps of 50 K having each a simulation time  
27 of 50 ps. The final structure of the equilibration phase has been used as the initial structure  
28 for the production phase. Starting from the equilibrated structure we have run 11 replicas with  
29 different initial velocities. The v-rescale thermostat algorithm<sup>6</sup> with a  $\tau_t=0.1$  ps at 300 K and  
30 the isotropic Parrinello-Rahman barostat algorithm<sup>7</sup> with  $\tau_p=0.1$  ps and P=1 atm have been  
31 used in the production phase that lasted 200 ns. The total cumulative simulation time among  
32 the 11 replicas is therefore 2.2  $\mu$ s saving 1 structure every 5 ps. The analysis of secondary  
33 structure elements has been performed with the DSSP package<sup>8</sup>. The most present residues in  
34 the interaction between miniPrPs have been identified with POPS<sup>9</sup>. The solvation properties  
35 of miniPrPs have been investigating using our in-house method<sup>10;11</sup>.

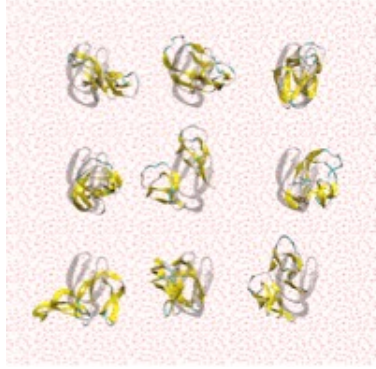

Figure 1: Simulation box: 18 miniPrPs ( $\beta$ -rich H2H3-Ov PrP<sup>Sc</sup>) placed on a grid (3 x 3 x 2) with distances among them in every direction initially fixed at 3 nm, random orientations and solvated with 63668 water molecules.

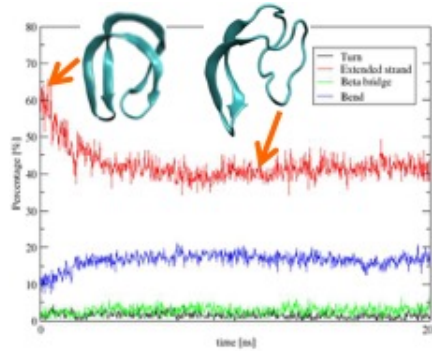

Figure 2: Evolution of the secondary structure elements of the miniPrPs during the aggregation process as calculated with DSSP. The percentage has been calculated counting the ratio between the number of residues of all the miniPrPs being in a specific secondary structure element and the total number of residues.

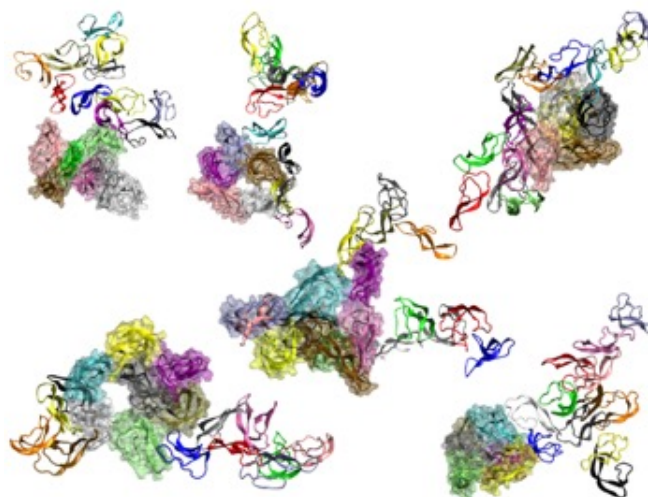

Figure 3: Final complexes for the replicas 5, 6, 7, 8, 9 and 10 with the miniPrPs belonging to the core represented with an opaque surface.

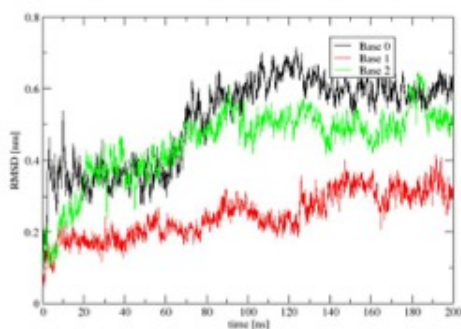

Figure 4: Root Mean Square Deviation (RMSD) of the simulated bases respect to the starting structure.

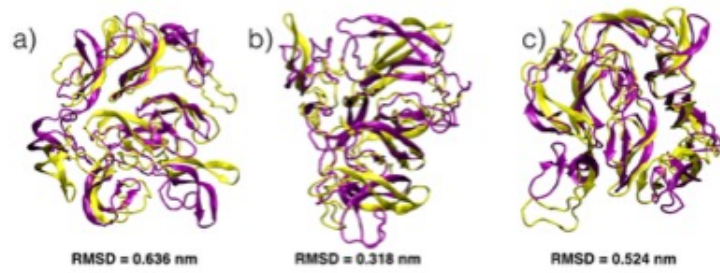

Figure 5: Superimposition of the first (purple) and last (yellow) structure from the simulation of the bases: (a) base of the replica 0, (b) base of the replica 1 and (c) base of the replica 2.

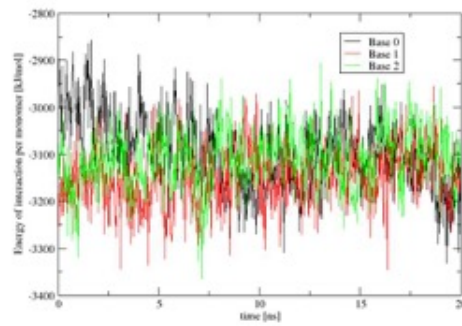

Figure 6: Energy of interaction per miniPrPs within the bases for the last 20 ns of simulation.

Table 1: a) Ranking order of the 15 most present residues in interaction between the miniPrPs of the bases. b) Ranking order of the 15 most present residues in interaction between the miniPrPs of the branches.

| a       |     | b       |     |
|---------|-----|---------|-----|
| Res     | %   | Res     | %   |
| LYS 197 | 7.2 | LYS 197 | 7.2 |
| THR 195 | 4.5 | LYS 207 | 4.9 |
| ARG 211 | 4.5 | GLN 215 | 4.7 |
| LYS 188 | 4.4 | LYS 188 | 4.6 |
| LYS 207 | 4.1 | ASN 184 | 4.5 |
| MET 209 | 4.1 | THR 195 | 3.8 |
| HIS 190 | 4.0 | ARG 211 | 3.8 |
| ASN 184 | 4.0 | MET 209 | 3.8 |
| THR 196 | 3.8 | MET 216 | 3.7 |
| ASN 200 | 3.7 | ASN 200 | 3.5 |
| GLN 215 | 3.6 | CYS 217 | 3.4 |
| MET 216 | 3.2 | HIS 190 | 3.4 |
| THR 202 | 3.1 | THR 196 | 3.2 |
| THR 186 | 2.8 | CYS 182 | 3.2 |
| GLN 189 | 2.7 | VAL 183 | 3.0 |

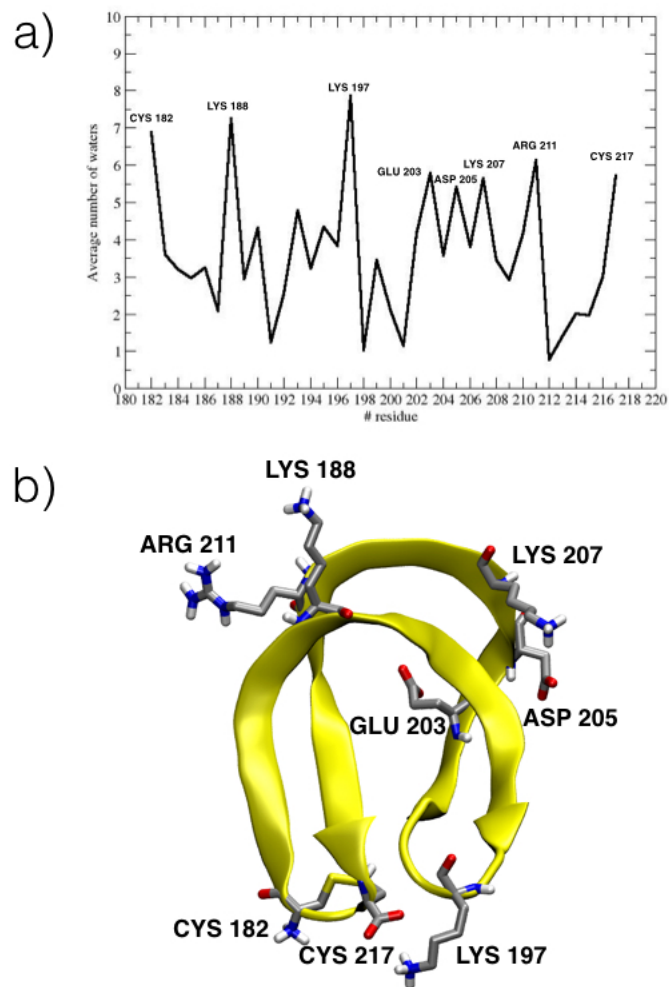

Figure 7: Solvation properties of the final complexes. a) Average number of waters visiting each residues; b) Rank of the first eight residues that, on average, are visited by a higher number of water molecules.

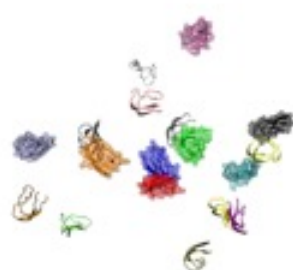

Figure 8: Two movies are available for the reader to watch the aggregation process as obtained with the atomistic molecular dynamics. The miniPrPs belonging to the core represented with an opaque surface.

## 36 References

- 37 [1] Berendsen, H. P.; van Gunsteren, J. P. M.; Hermans, W. F. J. *Intermolecular Forces* **1981**,  
38 331–342.
- 39 [2] Oostenbrink, C.; Villa, A.; Mark, A. E.; van Gunsteren, W. F. *Journal of Computational*  
40 *Chemistry* **2004**, *25*, 1656–1676.
- 41 [3] Abraham, M. J.; Murtola, T.; Schulz, S.; Pll, S.; Smith, J. C.; Hess, B.; Lindahl, E.  
42 *SoftwareX* **2015**, *1*, 19–25.
- 43 [4] Haire, L. F.; Whyte, S. M.; Vasisht, N.; Gill, A. C.; Verma, C.; Dodson, E. J.; Dodson, G. G.;  
44 Bayley, P. M. *Journal of Molecular Biology* **2004**, *336*, 1175–1183.
- 45 [5] Darden, T.; York, D.; Pedersen, L. *Journal of Chemical Physics* **1993**, *98*, 10082–10092.
- 46 [6] Bussi, G.; Donadio, D.; Parrinello, M. *J. Chem. Phys.* **2007**, *126*.
- 47 [7] Parrinello, M.; Rahman, A.
- 48 [8] Kabsch, W.; Sander, C. *Biopolymers* **1983**, *22*, 2577–2637.



- 49 [9] Cavallo, L.; Kleinjung, J.; Fraternali, F. *Nucleic Acid Research* **2003**, *31*, 3364–3366.
- 50 [10] De Simone, A.; Dobson, G. G.; Verma, C. S.; Zagari, A.; Fraternali, F. *Proceedings of*  
51 *National Academy of Science* **2005**, *102*, 7535–7540.
- 52 [11] Fornili, A.; Autore, F.; Chakroun, N.; Martinez, P.; Fraternali, F. *Methods Molecular Biol-*  
53 *ogy* **2012**, *819*, 375–392.
